# Supplementary material for: Spherical Bi2WO6/Bi2S3/MoS2 n-p Heterojunction with Excellent Visible-Light Photocatalytic Reduction Cr(VI) Activity
Source: MDPI journal article supplement (doi:10.3390/nano10091813), 2020-09-11
Supplement: s1 [file s1]

## 1. Determination of Cr(VI) concentration using the DPC method

The concentration of Cr(VI) was measured colorimetrically at  $\lambda_{\max} = 540 \text{ nm}$  by the standard diphenylcarbazide (DPC) method. In detail, the filtered sample 1 mL was injected into a 50 mL volumetric flask and diluted to scale with water. Subsequently, 0.5 mL of sulfuric acid, phosphoric acid solution (acid/water volume ratio 1:1) and 2 mL of freshly prepared DPC solution were successively added to the mixture. After vortexing the mixture for about 1 min, it was allowed to stand for another 10 min in order to ensure full color development. Using the distilled water as reference, the absorbance of the colored Cr(VI)-DPC complex solution was then measured at  $\lambda_{\max} = 540 \text{ nm}$ .

Preparation of DPC solution: 100 mg of DPC was dissolved in 50 mL mixed solution of acetone and water (Volume ratio 1:1) in a 50 mL volumetric flask, shaken well and stored it in a brown reagent bottle.

## 2. Characterization data

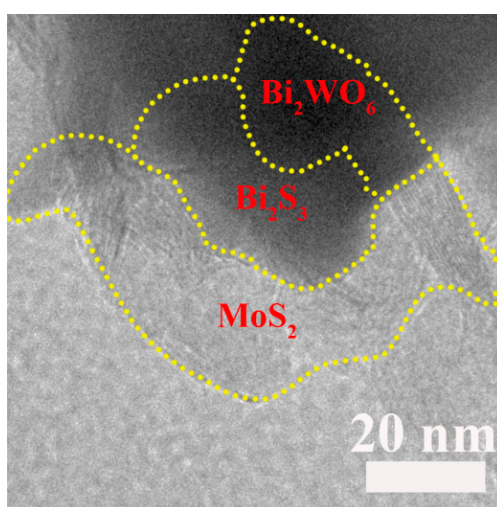

Figure S1. High-magnification TEM image of BBM-3.

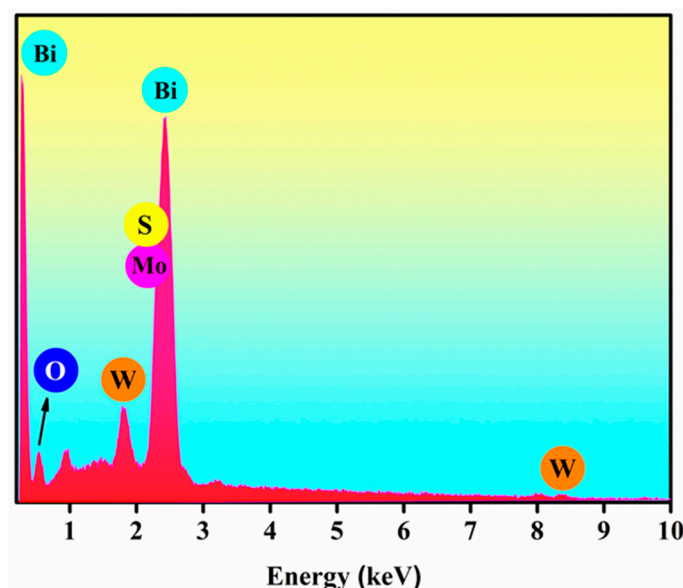

Figure S2. EDS analysis of the BBM-3.

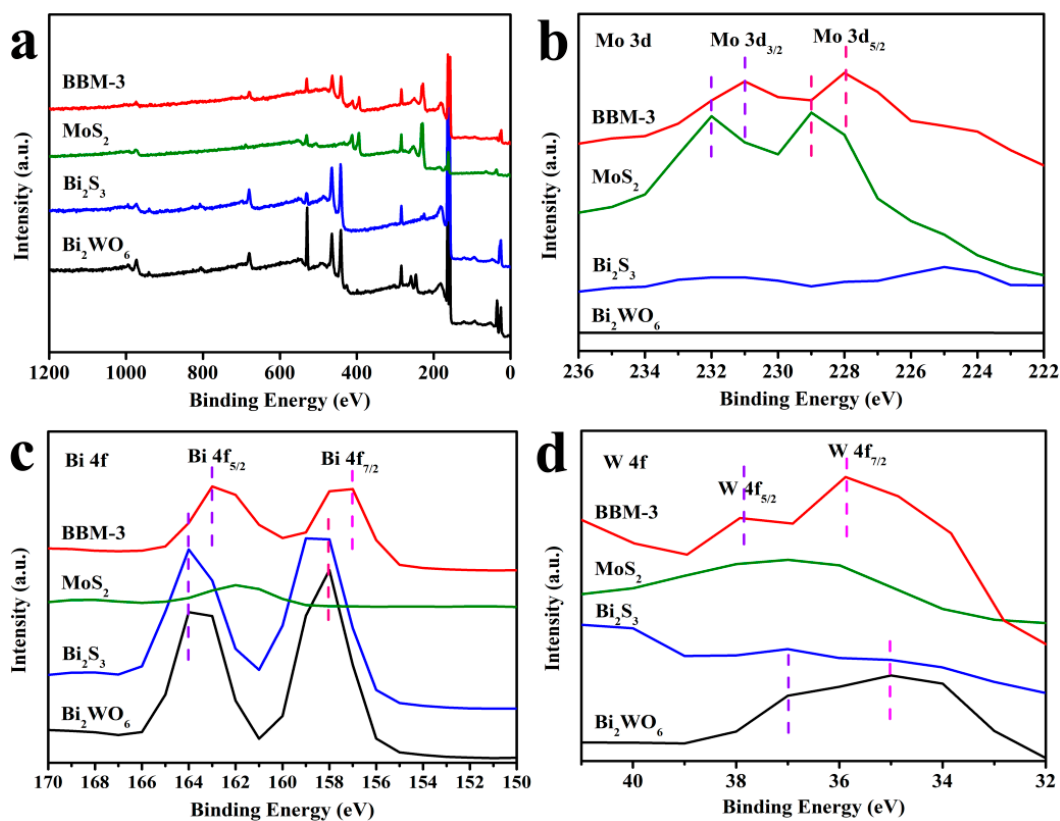

**Figure S3.** XPS spectra of  $\text{Bi}_2\text{WO}_6$ ,  $\text{Bi}_2\text{S}_3$ ,  $\text{MoS}_2$ , and BBM-3: (a) survey, (b) Mo 3d, (c) Bi 4f, and (d) W 4f.

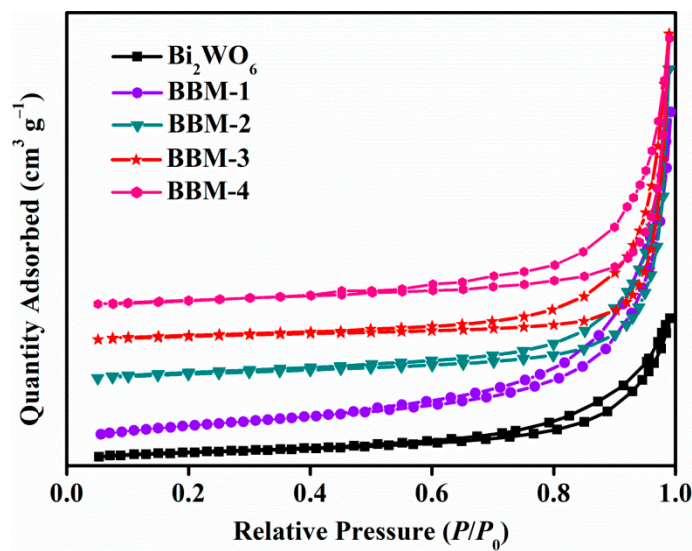

**Figure S4.**  $\text{N}_2$  adsorption-desorption isotherms of the  $\text{Bi}_2\text{WO}_6$ , BBM-1, BBM-2, BBM-3, and BBM-4.

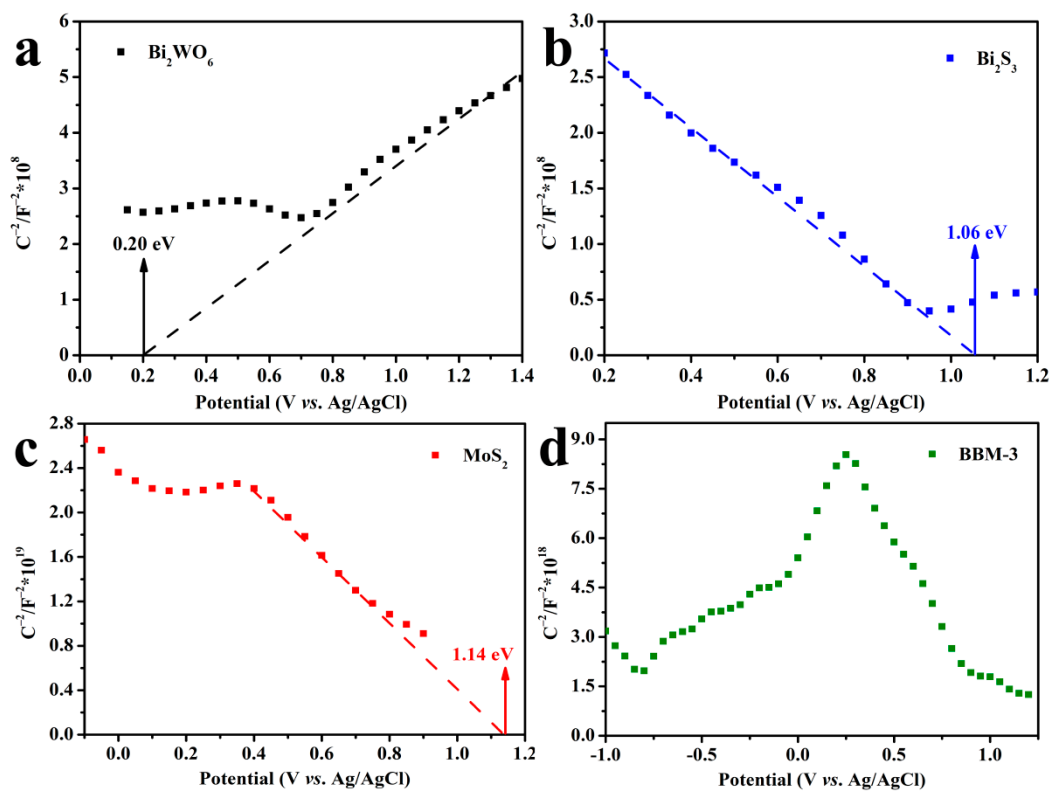

**Figure S5.** The Mott-Schottky curves of (a)  $\text{Bi}_2\text{WO}_6$ , (b)  $\text{Bi}_2\text{S}_3$ , (c)  $\text{MoS}_2$ , and (d) BBM-3.

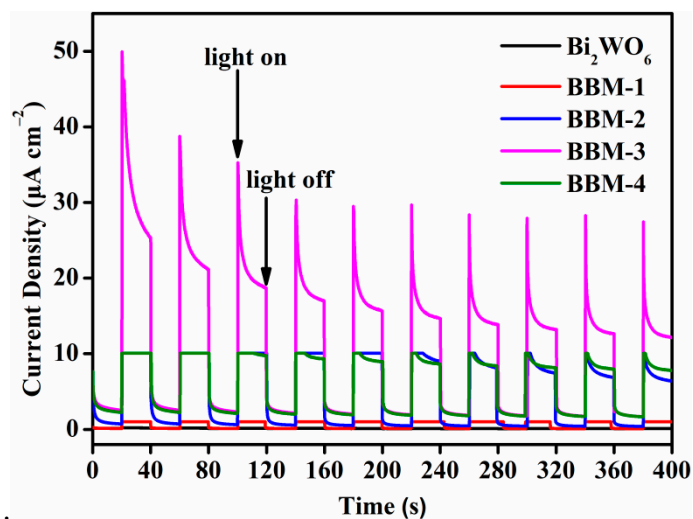

**Figure S6.** Photocurrent responses of  $\text{Bi}_2\text{WO}_6$ , BBM-1, BBM-2, BBM-3, and BBM-4.

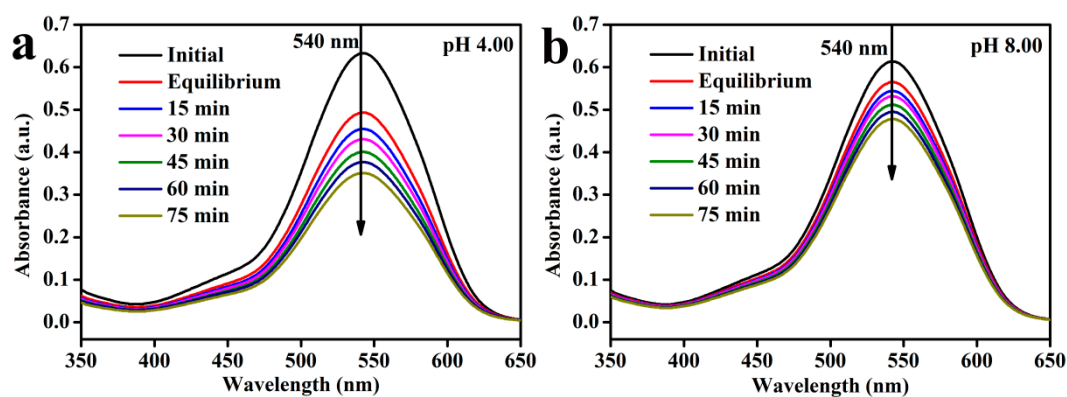

**Figure S7.** The UV-vis absorption spectra of Cr(VI) solution over the BBM-3 at (a) pH 4.00, and (b) pH 8.00.

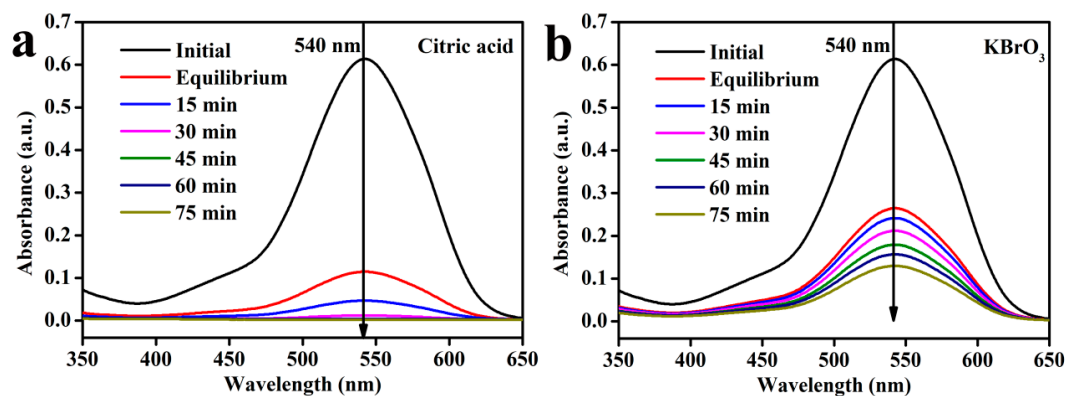

**Figure S8.** The UV-vis absorption spectra of Cr(VI) solution over the BBM-3 in the presence of (a) hole scavenger (citric acid) and (b) electron scavenger ( $\text{KBrO}_3$ ).

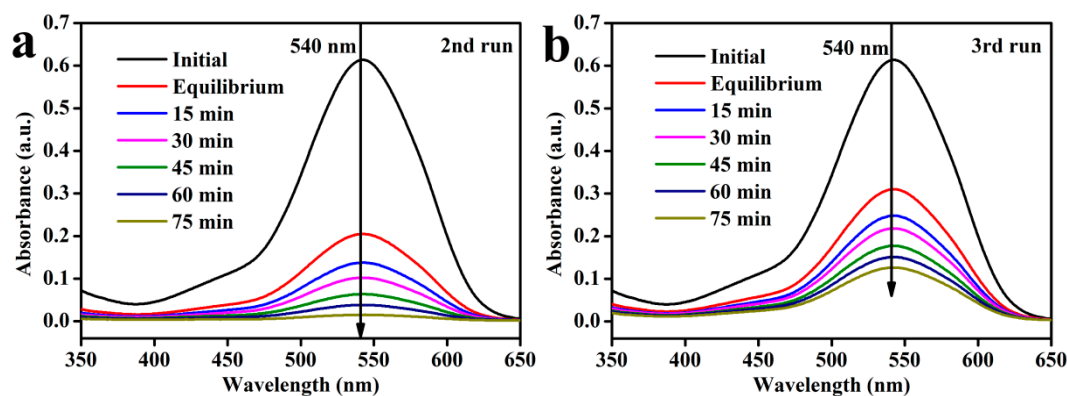

**Figure S9.** The UV-vis absorption spectra of Cr(VI) solution over the BBM-3 in the cycle experiments: (a) 2nd run and (b) 3rd run.
